# Supplementary material for: Exposure to Respirable Dust, Fine Particulates and Crystalline Silica and Comparative Respiratory Health Patterns Among Non-Smoking Workers in the Ceramic Industry
Source: Research Square preprint supplement (doi:10.21203/rs.3.rs-8487804/v1), 2026-01-13
Supplement: Supplementary file 1 [file 4cf8275f64b651d682ffc3be.docx]

**Supplementary File 1 – Statement on Gels and Blots (Not Applicable)**

**Statement on Gels and Blots**

The present manuscript does not involve any gel electrophoresis or blotting techniques, including but not limited to Western blots, Southern blots, or Northern blots.

The study is based on occupational exposure assessment (personal dust monitoring, PM₂.₅ measurement, and crystalline silica analysis using FTIR spectroscopy), questionnaire-based health assessment, and spirometry.

Therefore, no gel or blot images—cropped or uncropped—were generated as part of this research, and the requirement to provide full uncropped gel or blot images is **not applicable** to this manuscript.
